# Supplementary material for: GSDMD contributes to myocardial reperfusion injury by regulating pyroptosis
Source: PubMed Central journal article supplement (PMC9546776; doi:10.3389/fimmu.2022.893914), 2022-09-23
Supplement: DataSheet_1.pdf [file DataSheet_1.pdf]

**Supplement Table 1:** The baseline characteristics of the control group and AMI group.

|                              | Control (n=23)       | AMI (n=29)           | <i>p</i> value |
|------------------------------|----------------------|----------------------|----------------|
| Age                          | 63.04±2.52           | 64.66±2.50           | 0.656          |
| Male, Sex                    | 11 (47.83%)          | 26 (89.66%)          | 0.001          |
| <b>CV risks</b>              |                      |                      |                |
| Hypertension                 | 17 (73.91%)          | 16 (55.17%)          | 0.357          |
| Diabetes                     | 2 (8.70%)            | 11 (37.93%)          | 0.016          |
| Dyslipidemia                 | 8 (34.78%)           | 9 (31.03%)           | 0.775          |
| Smoking                      | 4 (17.39%)           | 16 (55.17%)          | 0.005          |
| Smoking history              | 6 (26.09%)           | 20 (68.97%)          | 0.002          |
| Drinking history             | 1 (4.35%)            | 6 (20.69%)           | 0.192          |
| Systolic pressure (mmHg)     | 126.87±2.77          | 127.66±3.92          | 0.871          |
| Diastolic pressure (mmHg)    | 78(70.00,90.00)      | 79(69.50,92.50)      | 0.637          |
| Heart rate (beats/min)       | 78.48±2.23           | 88.38±4.19           | 0.043          |
| <b>Lab. Examination</b>      |                      |                      |                |
| <b>Lipoproteins (mmol/L)</b> |                      |                      |                |
| Triglyceride                 | 1.46 (1.05, 2.05)    | 1.57 (1.09, 1.87)    | 0.985          |
| Total cholesterol            | 4.08 (3.06, 4.69)    | 4.20 (3.70, 5.26)    | 0.381          |
| LDL-C                        | 2.65±0.16            | 3.12±0.21            | 0.102          |
| HDL-C                        | 1.02 (0.93, 1.33)    | 0.99 (0.87, 1.12)    | 0.269          |
| <b>Renal function</b>        |                      |                      |                |
| BUN (mmol/L)                 | 5.68±0.28            | 6.40±0.35            | 0.127          |
| Creatinine (mmol/L)          | 69.00(63.00, 81.00)  | 80.00(66.00, 95.50)  | 0.107          |
| Uric acid (mmol/L)           | 342.04±17.56         | 367.10±18.47         | 0.339          |
| WBC (*10 <sup>9</sup> /L)    | 6.68±0.41            | 12.46±0.77           | <0.001         |
| Neutrophil (%)               | 60.10 (51.50, 67.90) | 86.50 (80.35, 90.70) | <0.001         |
| Stable HbA1c (%)             | 6.05 (5.58, 6.23)    | 6.10 (5.80, 7.30)    | 0.230          |
| Serum glucose(mmol/L)        | 5.00 (4.50, 5.60)    | 6.50 (5.40, 8.95)    | <0.001         |

|                             |                    |                     |        |
|-----------------------------|--------------------|---------------------|--------|
| CRP (mg/L)                  | 2.99 (2.04, 4.83)  | 7.20 (6.95, 8.45)   | <0.001 |
| ESR (mm)                    | 5.00 (2.00, 10.25) | 10.30 (4.69, 25.55) | 0.022  |
| EF                          | 0.63 (0.38, 0.65)  | 0.56 (0.49, 0.62)   | 0.319  |
| <b>Discharge medication</b> |                    |                     |        |
| Aspirin                     | 15 (65.22%)        | 25 (86.21%)         | 0.074  |
| Clopidogrel/ticagrelor      | 0 (0.00%)          | 25 (86.21%)         | <0.001 |
| ACEI/ARB                    | 10 (43.48%)        | 7 (24.14%)          | 0.140  |
| β-Blocker                   | 10 (43.48%)        | 21 (72.41%)         | 0.035  |
| Statin                      | 17 (73.91%)        | 28 (96.55%)         | 0.049  |
| Diuretics                   | 3 (13.04%)         | 4 (13.79%)          | 1      |

The data are presented as the median (interquartile ranges) or n (%).

LDL, low-density lipoprotein; CV, cardiovascular; HDL, high-density lipoprotein; BUN, blood urea nitrogen; WBC, white blood cell; HbA1c, glycated haemoglobin; CRP, C reactive protein; ESR, erythrocyte sedimentation rate; ACEI, angiotensin-converting enzyme inhibitor; ARB, angiotensin receptor blocker

A

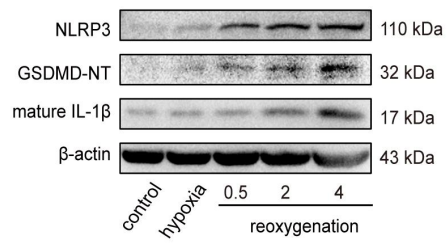

Figure S1

A, Immunoblot analysis of NLRP3, GSDMD-NT and mature IL-1 $\beta$  protein expression in H9c2 cells subjected to hypoxia for 6 hours and reoxygation for different durations.

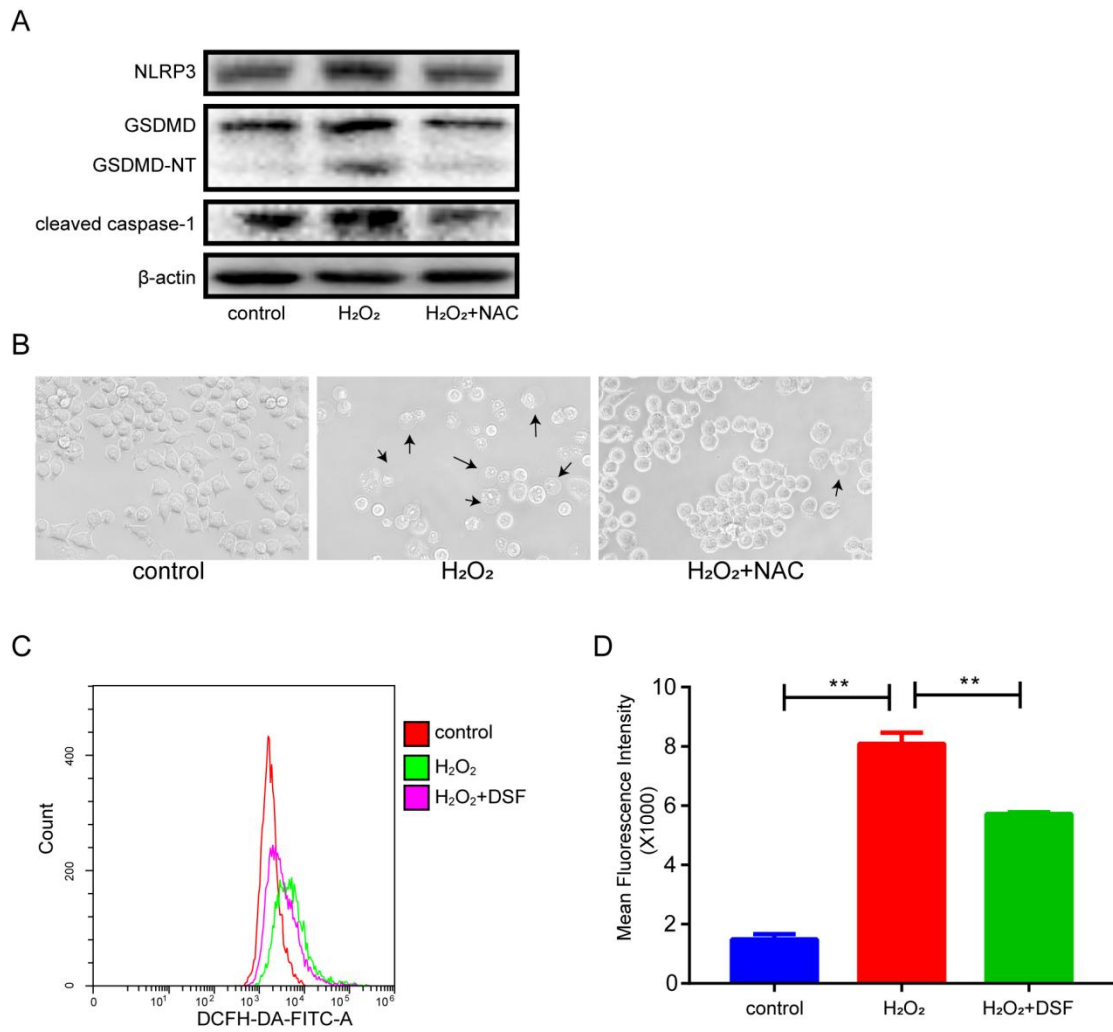

Figure S2

A, Representative Western blots (A) of NLRP3, GSDMD, GSDMD-NT and cleaved caspase-1 in Ana-1 cells treated with H<sub>2</sub>O<sub>2</sub> or H<sub>2</sub>O<sub>2</sub>+NAC. B, Representative images of Ana-1 cells after H<sub>2</sub>O<sub>2</sub> or H<sub>2</sub>O<sub>2</sub>+NAC treatment. C and D, Intracellular ROS levels were quantified using DCFH-DA for 30 min after the different treatments.
